# Supplementary material
Source: Frontiers journal article supplement (https://www.frontiersin.org/articles/417407)
Supplement: Data_Sheet_1.docx [file Data_Sheet_1.docx]

# Supplementary Material

**Global Water Transfer Megaprojects:**

**A Potential Solution for the Water-Food-Energy Nexus?**

Oleksandra Shumilova, Klement Tockner, Michele Thieme, Anna Koska and Christiane Zarfl

# List of information sources used to collect data on water transfer megaprojects

# planned and under construction

**AFRICA**

**El Salam Project**

Hafez AI (2005) Investigations of El-Salam Canal, Project in Northen Sinai, Egypt. Phase I: Environmental baseline, soil and water quality studies. Ninth International Water Technology Conference, Sharm El-Sheikh, Egypt pp. 953-970

Othman AA, Rabeh SA, Fayez M, Monib M, Hegazi NA (2012) El-Salam canal is a potential project reusing the Nile Delta drainage water for Sinai desert agriculture: microbial and chemical water quality. J Adv Res 3:99–108

**Jonglei canal**

Background: Sudan's Jonglei Canal Project. Retrieved from: <http://www.worldpress.org/jonglei.htm>

Keys P. (2011, March 30) Egypt’s Jonglei Canal Gambit. Water security. Retrieved from: <https://watersecurity.wordpress.com/2011/03/30/egypts-jonglei-canal-gambit/>

Lupai J (2007, May 28) The Jonglei Canal Project in Southern Sudan: why the hurry and for whose benefit is it? Sudan Tribute. Retrieved from: <http://www.sudantribune.com/spip.php?article22060>

Salman MA (2011) The new state of South Sudan and the hydropolitics of the Nile Basin. Water International 36:154-166

Tockner K, Bernhardt ES, Koska A, Zarfl C (2016) A global view on Future Major Water Engineering Projects. In: Hüttl RF, Bens O, Bismuth C, Hoechstetter S (Eds). Society-Water-Technology. Springer: Heidelberg, Germany, pp. 47–64

**Lesotho Highlands Water Project**

Mwangi, O. 2007. Hydropolitics, ecocide and human security in Lesotho: a case study of the Lesotho Highlands Water Project. Journal of Southern African Studies, 33(1): 3–17

WWF (2007) Pipedream? Inter basin water transfer and water shortages. WWF Global Freshwater Programme, World Wide Fund For Nature, Switzerland

A Brief History of Africa’s Largest Water Project (2005, January) International rivers. Retrieved from: <https://www.internationalrivers.org/resources/a-brief-history-of-africa%E2%80%99s-largest-water-project-3664>

Lesotho Highlands Water Project. Project website. Retrieved from: <http://www.lhwp.org.ls/>

**Mokolo and Crocodile River (West) Water Augmentation Project**

Barradas S (2015, April 24) Mokolo and Crocodile River (West) Water Augmentation Project, South Africa. Retrieved from: <http://www.engineeringnews.co.za/print-version/mokolo-and-crocodile-river-west-water-augmentation-project-south-africa-2015-04-24>

Molekoa L (2011, April 21) Mokolo and Crocodile river water augmentation project, South Africa. Retrieved from: <http://www.engineeringnews.co.za/print-version/crocodile-mokolo-water-augmentation-project-cmwap-south-africa-2008-12-12>

Republic of South Africa. Department of water and sanitation. Mokolo and Crocodile River (West): Water Augmentation Project (MCWAP). Retrieved from: <https://www.dwa.gov.za/projects/mcwap/overview.aspx>

**Mzimvubu Water Project**

Republic of South Africa. Department of water and sanitation. Mzimvubu water project. Retrieved from: <https://www.dwa.gov.za/mzimvubu/>

[Petterson](http://www.infrastructurene.ws/author/danielle/) D (2016, August 1) Update on the Mzimvubu Water Project. Retrieved from: [http://www.infrastructurene.ws/2016/08/01/update-on-the-mzimvubu-water-project/#](http://www.infrastructurene.ws/2016/08/01/update-on-the-mzimvubu-water-project/)

**New Nile Project**

Ahram A (2014, May 25) Egypt wants to Diverting the Congo River to the Nile. Retrieved from: <http://www.diretube.com/articles/read-egypt-wants-to-diverting-the-congo-river-to-the-nile_4754.html>

Egypt’s 'Lost Dream' of Linking Congo, Nile Rivers (2013, April 14) Al-Monitor. The pulse of Middle East. Retrieved from: <http://www.al-monitor.com/pulse/ar/originals/2013/10/egypt-congo-river-water-nile.html#ixzz54GjbCi1e>

**New Valley Project / Toshka Project**

Scilling DR (2013, January 10) Egypt’s $90 Billion South Valley Project. Industry Tap. Retrieved from: <http://www.industrytap.com/egypts-90-billion-south-valley-project/539>

The Report: Egypt 2017 (2017) Ambitious plans in Egypt to improve food security involve reclaiming desert land. Retrieved from: https://oxfordbusinessgroup.com/analysis/greening-desert-ambitious-plans-improve-food-security-involve-reclaiming-vast-tracts-desert-land

**Transaqua Project**

Ifabiyi IP (2013) Recharging the Lake Chad: The hydro-politics of national security and regional integration in Africa. African Research Review 7:196–216

Tarumbwa-Strid P (2012) The Transaqua Project: Beginning of an African Rebirth. Retrieved from: <http://larouchepub.com/eiw/public/2012/eirv39n23-20120608/45-47_3923.pdf>

Kürschner-Pelkmann K (2013, June 1) [Der Tschadsee schrumpft, die Probleme wachsen](http://www.epo.de/index.php?option=com_content&view=article&id=10646:der-tschadsee-schrumpft-die-probleme-wachsen&catid=251&Itemid=100211). Entwicklungspolitikonline. Retrieved from: <http://www.epo.de/index.php?option=com_content&view=article&id=10646:der-tschadsee-schrumpft-die-probleme-wachsen&catid=251:analysen&Itemid=100211>

**uMkhomazi Water Project**

Republic of South Africa. Department of water and sanitation. Introduction to the uMkhomazi Water Project, Phase 1 (uMWP1). Retrieved from: <https://www.dwa.gov.za/Projects/uMkhomazi/default.aspx>

[Frankson](http://www.infrastructurene.ws/author/liesl/) L (2015, July 22) Umkhomazi Water Project underway. Retrieved from: http://www.infrastructurene.ws/2015/07/22/umkhomazi-water-project-underway/

**ASIA**

**Ankara Water Supply Project (Kizilirmak plan)**

Karakaya F, Evrendilek F, Gonenc E (2014) Interbasin Water Transfer Practices in Turkey. J Ecosys Ecograph 4:149.

Islar M, Boda C (2014) Political Ecology of Inter-Basin Water Transfers in Turkish Water Governance. Ecology and Society 19:15

Franz C, Tigrek S, Kibaroglu A (2012) Water supply crisis in Ankara: review and comparison of the “1995 Master Plan Report on Ankara Water Supply Project”. Scientific Research and Essays 7:288-299

**Gerede Project**

Karakaya F, Evrendilek F, Gonenc E (2014) Interbasin Water Transfer Practices in Turkey. J Ecosys Ecograph 4:149.

Franz C, Tigrek S, Kibaroglu A (2012) Water supply crisis in Ankara: review and comparison of the “1995 Master Plan Report on Ankara Water Supply Project”. Scientific Research and Essays 7:288-299

**Great Melen Project**

Karakaya F, Evrendilek F, Gonenc E (2014) Interbasin Water Transfer Practices in Turkey. J Ecosys Ecograph 4:149.

Islar M, Boda C (2014) Political Ecology of Inter-Basin Water Transfers in Turkish Water Governance. Ecology and Society 19:15

Van Leeuwen CJ, Sjerps R (2015b) Istanbul: the challenges of integrated water resources management in Europa’s megacity. Environ Dev Sustain doi: [10.1007/s10668-015-9636-z](https://doi.org/10.1007/s10668-015-9636-z)

Tigrek S, Kibaroglu A (2011) Strategic role of water resources for Turkey. Pages 27-43 in A. Kibaroglu, W. Scheumann, and A. Kramer, editors. Turkey’s water policy: national frameworks and international cooperation. Springer, Berlin, Germany. [http://dx.doi.org/10.1007/978-3-642-19636-2_2](http://dx.doi.org/10.1007%2F978-3-642-19636-2_2)

**Central Yunnan Water Transfer Project**

Chen S (2017, October 29) Chinese engineers plan 1,000km tunnel to make Xinjiang desert bloom. South China Morning Post. Retrieved from: http://www.scmp.com/news/china/society/article/2116750/chinese-engineers-plan-1000km-tunnel-make-xinjiang-desert-bloom

[Jakereznick](https://greenguanxi.wordpress.com/author/jrez24/) (2013, June 25) Yunnan’s 68 Billion RMB drought solution: The Central Yunnan Water Transfer Project. Green Guanxi. Retrieved from: <https://greenguanxi.wordpress.com/2013/06/25/yunnans-68-billion-rmb-drought-solution-the-central-yunnan-water-withdrawal-project-part-1/>

Jing G, Zheng C (2012, January 1) China’s thirst for water transfer. Chinadialogue. Retrieved from: <https://www.chinadialogue.net/article/show/single/en/4722>

**Disi Water Conveyance Project / Disi-Mudawwara project**

Namrouqa H (2015, May 2) Jordan, Saudi Arabia sign deal to protect shared aquifer. The Jordan Times.  Retrieved from: <http://www.jordantimes.com/news/local/jordan-saudi-arabia-sign-deal-protect-shared-aquifer>

Greater Amman, Jordan. Retrieved from: <http://www.water-technology.net/projects/greater_amman/>

de Chatel F (2016) Tackling Water Scarcity in Jordan. Revolve Water. Retrieved from: <http://www.revolve-water.com/jordan-water-scarcity/>

**Herlen-Gobi and Orkhon-Gobi Water Transfer Projects**

Enkgbaatar B (2014) Presentation. Mining infrastructure investment support project. Retrieved from: <https://www.slideshare.net/ulziimyagmar/0220212014-presentation-mining-infrastructure-investment-support-project-b-enkhbaatar>

Dugersuren S. (2011) Presentation “Watch Mining in Mongolia and possible transboundary impacts of water transfers from Orkhon and Herlen Rivers”. International conference on “Europe-Asia transboundary water cooperation”, Geneva, December 15-16, 2011. Retrieved from: https://www.unece.org/fileadmin/DAM/env/documents/2011/wat/Int._Conference/presentations/Session_5/4_Mongolia_Sukhgerel_Orhon_Herlen-Gobi_Project_Transboundary_ImpacESt.pdf

“Orkhon-Gobi” project proposal (2009) Retrieved from: http://www.watercenter.mn/

Walton T (2010) Southern Gobi Regional Environmental Assessment. Mongolia Discussion Papers, East Asia and Pacific Sustainable Development Department. Washington, D.C.: World Bank

Simonov E, Wickel B (2017) Kherlen River: the Lifeline of the Eastern Steppe. Executive summary, water Infrastructure impacts checklist and community survey. Retrieved from: <http://www.transrivers.org/pdf/2017KherlenexENG.pdf>

Groundwater Assessment of the Southern Mongolia (SGR). Preliminary Conclusions. September 2008. Retrieved from: http://hispagua.cedex.es/sites/default/files/especiales/Trasvases%20Asia/groundwater_mongolia.pdf

**Irtysh-Ishim canal**

Kazakhstan considering a water canal to link the Irtysh River to the Ishim River across Astana (2013, October 07) TengriNews. Retrieved from: <https://en.tengrinews.kz/industry_infrastructure/Kazakhstan-considering-a-water-canal-to-link-the-Irtysh-23149/>

**Konya Plain Project**

Karakaya F, Evrendilek F, Gonenc E (2014) Interbasin Water Transfer Practices in Turkey. J Ecosys Ecograph 4:149.

Berktay A, Nas B, Demirbas A (2006) Contribution of Konya plain projects to the national development in Turkey's water-related energy, Energy Explor Exploit 24:87–94

Konya Plain Project an upgrade for central Anatolian cities (2015, May 3) DAILY SABAH. Retrieved from: <https://www.dailysabah.com/turkey/2015/05/03/konya-plain-project-an-upgrade-for-central-anatolian-cities>

**Lake Baikal to China transfer project**

Simonov E (2017, April 3) China revives Siberian river diversion project. Retrieved from: <https://www.thethirdpole.net/2017/04/10/lake-baikal-pipeline-threatens-critical-ecosystem/>

**National River Linking Project**

Shukla AC, Vandana A (2005) Anatomy of interlinking rivers in india: a decision in doubt. Program in Arms Control, Disarmament, and International Security, University of Illinois at Urbana-Champaign. Retrieved from: https://www.ideals.illinois.edu/bitstream/handle/2142/42/Shukla-AsthanaOP.pdf?sequence=1&isAllowed=y

Bansal S (2014, September 14) National River Linking Project: Dream or disaster? Indian Water Portal. Retrieved from: http://www.indiawaterportal.org/articles/national-river-linking-project-dream-or-disaster

Amarasinghe U (2012) The National River Linking Project of India. Some contentious issues. IWMI-Tata Water Policy Program. Retrieved from: <http://www.iwmi.cgiar.org/iwmi-tata/PDFs/2012_Highlight-16.pdf>

**Pahang-Selangor Raw Water Transfer Project**

ICID (2005) Experiences in inter-basin water transfers for irrigation, drainage or flood management (3rd draft 15 August 2005). Unpublished report. International Commission on Irrigation and Drainage ICID-CIID, New Delhi. URL: <http://www.icid.org/ibwt_draft_aug05.pdf>

Interstate water transfer project hits snag. (2014, September 3) Retrieved from: <http://www.mysinchew.com/node/58281>

Pahang-Selangor raw water transfer to flow by 2017, says Adnan Yaakob. (2011, June 4) Retrieved from: <http://www.themalaymailonline.com/malaysia/article/pahang-selangor-raw-water-transfer-to-flow-by-2017-says-adnan-yaakob#G1j2j6q6dX7ZYi4y.99>

# Red Sea – Dead Sea Conduit

Red Sea-Dead Sea Project (2017, August 14). Retrieved from: https://water.fanack.com/specials/red-sea-dead-sea-project/

**SibAral Project / Soviet Union River Diversion Project**

Micklin P (2011) The Siberian Water Transfer Scheme. In: P. Micklin et al. (eds.) The Aral Sea, Springer Earth System Sciences. pp. 381-403

Pearce F (2004, February 9) Russia reviving massive river diversion plan. New Scientist. Retrieved from: <https://www.newscientist.com/article/dn4637-russia-reviving-massive-river-diversion-plan/>

Badescu V et al (2011) Aral Sea partial restoration I: A Caspian water importation macroproject. International Journal of Environment and Waste Management 7: 161-182

**Southeastern Greater Anatolian Project (GAP)**

Yuksel I (2015). South-eastern Anatolia Project (GAP) factor and energy management in Turkey, Energy Reports 1:151-155

Sternberg (2016) Water megaprojects in deserts and drylands. International Journal of Water Resources Development 32:301–320

**South-North Water Transfer Project**

Webber M, Crow-Miller B, Rogers S (2017) The South-North Water Transfer Project: Remaking the geography of China. Regional Studies

South-North Water Transfer Project. Retrieved from: https://www.internationalrivers.org/campaigns/south-north-water-transfer-project

WWF (2007) Pipedream? Inter basin water transfer and water shortages. WWF Global Freshwater Programme, World Wide Fund For Nature, Switzerland

Barnett J, Rogers S, Webber M, Finlayson B, Wang M (2015, November 18) Sustainability: Transfer project cannot meet China's water needs. Nature. Retrieved from: <http://www.nature.com/news/sustainability-transfer-project-cannot-meet-china-s-water-needs-1.18792>

South-to-North Water Diversion. Office of the South-to-North Water Diversion Project Comission of the State Council. Retrieved from: <http://www.nsbd.gov.cn/zx/english/erp.htm>

South-to-North Water Diversion Project, China. Retrieved from: <http://www.water-technology.net/projects/south_north>

Wong S (2007) China Bets on Massive Water Transfers to Solve Crisis. International rivers. Retrieved from: <https://www.internationalrivers.org/resources/china-bets-on-massive-water-transfers-to-solve-crisis-1899>

Yu M, Wang C, Liu Y, Olsson G, Wang C (2018) Sustainability of mega water diversion projects: Experience and lessons from China. Science of the Total Environment 619-620:721-731

**Tibet to Xinjiang tunnel**

Balachandran M (2017, October 30) China’s planning a 1,000km tunnel to divert water away from one of India’s largest rivers. Quartz India. Retrieved from: https://qz.com/1114843/chinas-grand-plan-for-the-brahmaputra-a-1000km-tunnel-to-divert-water-away-from-tibet/

**Yettinahole Diversion Project**

Herald S (2016, September 3) [Yettinahole Project costs 13,000 crores to provide water](https://www.apherald.com/Politics/ViewArticle/149706/Yettinahole-Project-costs-13-000-crores-to-provide-water/). India Herald. Retrieved from: <http://www.apherald.com/Politics/ViewArticle/149706/Yettinahole-Project-costs-13-000-crores-to-provide-water>

Krishnadas M, Jumani S (2017, January 24) Why Diverting Yettinahole River is Both Ecologically Damaging and Economically Unsound. The Wire. Retrieved from: <https://thewire.in/102253/yettinahole-karnataka-bengaluru-chikkaballapur/>

PM News Bereau (2014, March 6) Netravati River diversion project moves forward despite opposition. Project Monitor. Retrieved from: <http://www.projectsmonitor.com/daily-wire/netravati-river-diversion-project-moves-forward-despite-opposition/>

**AUSTRALIA**

**Bradfield Scheme**

Australia’s Next Great National Projects. http://www.peoplesmandate.iinet.net.au/Bradfield_The_Greatest_Scheme_of_all_2000.pdf The Bradfield scheme. Shaping the Nation’s Future. Vision 2000. Retrieved from:

McCarthy M (2016, December 19) 'Populist' and 'never to happen': critics brush off One Nation's calls to drought-proof western Queensland. Retrieved from: <http://www.abc.net.au/news/rural/2016-12-19/qld-conservationists-criticise-one-nations-bradfield-plan/8132284>

**Connors River Dam and Pipeline Project with pipeline to Alpha**

Moranbah to Alpha Pipeline Project. Industry Briefing (2011, June 22) SunWater Limited. Retrieved from: <http://www.sunwater.com.au/__data/assets/pdf_file/0003/7284/Industry_Briefing_-_Moranbah_to_Alpha_Pipeline_Project.pdf>

Queensland Government. Department of State Development, Manufacturing, Infrastructure and Planning. (2017, December 6) Connors River Dam and Pipelines. Project overview. Retrived from: <http://www.statedevelopment.qld.gov.au/assessments-and-approvals/connors-river-dam-and-pipelines.html>

Planning for water security: the Connors River Dam Pipeline (2016, March 16) The Australian pipeliner. Retrieved from: <https://www.pipeliner.com.au/2016/03/16/planning-for-water-security-the-connors-river-dam-pipeline/>

**Kimberley–Perth Canal**

Liberal MP pushes referendum on Kimberley - Perth canal (2011, August 11) WA News. Retrieved from: <http://www.watoday.com.au/wa-news/liberal-mp-pushes-referendum-on-kimberley--perth-canal-20110810-1ilwz.html>

Canal company yet to assess environmental issues (2005, February 7) ABC News. Retrieved from: [http://www.abc.net.au/news/2005-02-07/canal-company-yet-to-assess-environmental- issues/632608](http://www.abc.net.au/news/2005-02-07/canal-company-yet-to-assess-environmental-%20issues/632608)

[Fickling](https://www.theguardian.com/profile/davidfickling) D (2004, November 17) World's longest canal could solve Perth's water problems. The Guardian. Retrieved from: <https://www.theguardian.com/world/2004/nov/17/australia.davidfickling>

**Kimberley–Perth Pipeline**

Perth WA (2006) Options for bringing water to Perth from the Kimberley : an independent review /​ commissioned by Department of the Premier and Cabinet, Government of Western Australia. Retrieved from: <https://trove.nla.gov.au/work/19687829?selectedversion=NBD40347873>

**Marshal's plan canal**

Bartlett L (2016, October 22) The WA water plan that could answer Malcolm Turnbull’s infrastructure agenda. PerthNow. Retrieved from: http://www.perthnow.com.au/news/opinion/liam-bartlett/liam-bartlett-the-wa-water-plan-that-could-answer-malcolm-turnbulls-infrastructure-agenda/news-story/d7cc70f536c6e0ce3962c651b42dd943

**Nathan Dam and Pipelines**

Nathan Dam and Pipelines Project. Project update (2017, June) SunWater. Retrieved from: <http://www.sunwater.com.au/__data/assets/pdf_file/0015/22308/Nathan_Dam_Newsletter_June_2017.pdf>

Queensland Government. Department of State Development, Manufacturing, Infrastructure and Planning. (2017, December 6) Nathan Dam and Pipelines. Project overview. Retrieved from: <http://www.statedevelopment.qld.gov.au/assessments-and-approvals/nathan-dam-and-pipelines.html>

**Water diversion from Northern Queensland**

Engineer proposes $9b plan to divert North Queensland river water to parched areas via canal (2010, October 10) Courier Mail. Retrieved from: www.couriermail.com.au/news/queensland/engineer-proposes-9b-plan-to-divert-north-queensland-river-water-to-parched-areas-via-canal/news-story/9f07bf429da98974a2be5b187b3a78c3?sv=20132b97b5d0e573473feb5a402335a9

**EUROPE**

**Alqueva Project**

de Melo JJ, Janeiro C (2005) Alqueva dam and irrigation project: hard lessons learned from good and bad assessment practice. Retrieved from: <http://rioslivresgeota.org/wp-content/uploads/2016/09/2005IAIA_AlquevaDam.pdf>

Aqueva. Changing Ecologies of the Montado Landscape Alentejo, Portugal. (2015, May) Department of Landscape Architecture and Environmental Planning. The Portuguese Studies Program, University of California, Berkeley. Retrieved from: <http://ced.berkeley.edu/downloads/research/AlquevaReportLA205-2015.pdf>

Empresa de Desenvolvimento e Infraestruturas do Alqueva. Retrieved from: <http://www.edia.pt/en/alqueva/multiple-purposes/187>

**Acheloos River diversion project**

WWF (2007) Pipedream? Inter basin water transfer and water shortages. WWF Global Freshwater Programme, World Wide Fund For Nature, Switzerland

Acheloos River Diversion Project, Greece. Retrieved from: http://www.water-technology.net/projects/acheloos/

Acheloos dams. Large dam database in Greece. Retrieved from: <http://users.itia.ntua.gr/nikos/dams/list%20of%20dams/r_Acheloos/acheloos%20dams.htm>

**Languedoc-Roussillon-Catalogne (LRC) aqueduct (Rhône water transfer)**

Gorostiza, S., March H., Sauri D. (2017) Flows from beyond the Pyrenees. The Rhône River and Catalonia's search for water independence. Political Geography, 60:132-142.

**NORTH AMERICA**

**Alaska Subsea Pipeline**

Forest B, Forest P (2012) Engineering the North American waterscape: the high modernist mapping of continental water transfer projects. Political Geography 31:167–183.

U.S. Congress, Office of Technology Assessment, Alaskan Water for California? The Subsea Pipeline Option Background Paper, OTA-BP-O-92 (Washington, DC: U.S. Government Printing Office, January 1992). Retrieved from: <http://ota.fas.org/reports/9203.pdf>

**Bear River Pipeline within The Bear River Development Project**

Bowen, Collins & Associates and HDR Engineering, "Bear River Pipeline Concept Report Volume 1" (2014) Water. Paper 16. Retrieved from: https://digitalcommons.usu.edu/govdocs_water/16

The Bear River Diversion (2015, October 19) Utah Rivers Council. Retrieved from: <http://utahrivers.org/cause/the-bear-river-project/>

Weiser M (2016, August 19) Bear River: The biggest dam project you’ve never heard of. Neews Deeply. Retrieved from: https://www.newsdeeply.com/water/articles/2016/08/29/bear-river-the-biggest-dam-project-youve-never-heard-of

**California Water Fix and Eco Restore**

Fixing California’s Water System. Project’s website: <https://www.californiawaterfix.com/>

Cowin M (2013) The Bay Delta Conservation Plan: An Overview and Local Perspectives. Western City. Retrieved from: <http://www.westerncity.com/Western-City/July-2013/The-Bay-Delta-Conservation-Plan/>

**Canadian Water Export (Kuiper Plan)**

de Silva A (1997)The Sale of Canadian Water to the United States: A Review of Proposals, Agreements and Policies. [Environment Probe](https://environment.probeinternational.org/author/elizabethbrubaker/). Retrieved from: <https://environment.probeinternational.org/1997/08/18/sale-canadian-water-united-states-review-proposals-agreements-and-policies/>

Forest B, Forest P (2012) Engineering the North American waterscape: the high modernist mapping of continental water transfer projects. Political Geography 31:167–183.

**Central North American Water Project (CeNAWP)**

de Silva A (1997)The Sale of Canadian Water to the United States: A Review of Proposals, Agreements and Policies. [Environment Probe](https://environment.probeinternational.org/author/elizabethbrubaker/). Retrieved from: <https://environment.probeinternational.org/1997/08/18/sale-canadian-water-united-states-review-proposals-agreements-and-policies/>

Forest B, Forest P (2012) Engineering the North American waterscape: the high modernist mapping of continental water transfer projects. Political Geography 31:167–183.

**Columbia South West Project**

ICID (2005) Experiences in inter-basin water transfers for irrigation, drainage or flood management (3rd draft 15 August 2005). Unpublished report. International Commission on Irrigation and Drainage ICID-CIID, New Delhi. URL: <http://www.icid.org/ibwt_draft_aug05.pdf>

**Comprehensive Everglades Restoration Plan**

Comprehensive Everglades Restoration Plan (CERP) Everglades National Park Service. Retrieved from: https://www.nps.gov/ever/learn/nature/cerp.htm

Central and Southern Florida Project. Report to Congress 2015. Comprehensive Everglades restoration plan. Retrieved from: https://evergladesrestoration.gov/content/cerpreports/cerp_2015_rpt_to_congress.pdf

**Eastern Nevada to Las Vegas pipeline**

Lohan T (2012, September 18) 5 Crazy Schemes We May Turn to For More Water. Alternet. Retrieved from: <http://www.alternet.org/water/5-crazy-schemes-we-may-turn-more-water>

**Flaming Gorge Pipeline**

Wockner G (2012, October 10) $9 Billion Flaming Gorge Pipeline Would Further Drain the Colorado River System. Retrieved from: <https://www.huffingtonpost.com/gary-wockner/flaming-gorge-pipeline_b_1195154.html>

**Gingras Project**

Gingrass F. P. (2009) Un projet réaliste, durable et rentable pour exploiter l’or bleu québécois. Retrieved from: <http://www.iedm.org/files/juillet09_fr.pdf>

**Great Lakes-Pacific Waterways Plan**

van der Leeden, F., Troise, F.L., Todd, D.K. (1990) The water encyclopedia. Second edition. CRC Press.

Forest B, Forest P (2012) Engineering the North American waterscape: the high modernist mapping of continental water transfer projects. Political Geography 31:167–183.

Golubev, G., Grin, G., Melnikova, G., Whetstone G. (1978) Bibliography on interregional water transfers. Water Supply and Management, 2, 187-211.

**Great Recycling and Northern Development (GRAND) Canal of North America**

Gramble (1989) Commentary. The Grand Canal Scheme. J Great Lakes Res 15:531-533

Milko R (1986) Potential ecological effects of the proposed Grand Canal Diversion project on Hudson and James bays. ARCT 39:316–326

A Brief History of the Great Recycling and Northern Development (Grand) Canal Project (2006, December 2) Retrieved from: <https://waterwars.wordpress.com/2006/12/02/a-brief-history-of-the-great-recycling-and-northern-development-grand-canal-project/>

**High Plains Water Transfer Alternatives**

ICID (2005) Experiences in inter-basin water transfers for irrigation, drainage or flood management (3rd draft 15 August 2005). Unpublished report. International Commission on Irrigation and Drainage ICID-CIID, New Delhi. URL: <http://www.icid.org/ibwt_draft_aug05.pdf>

**Hydraulic Plan of the Northeast Gulf (PLHIGON)**

PLHINO/PLHIGON: Watering Mexico’s Desert (2013, August 13) Retrieved from: <http://www.larouchepub.com/eiw/public/2013/eirv40n34-20130830/16_4034.pdf>

Small D (2007) U.S. and Mexico: Cooperate On Great Water Projects. Executive Intelligence Review, 34:64-73 Retrieved from: <http://www.larouchepub.com/eiw/public/2007/eirv34n47-48-20071207/eirv34n47-48-20071207.pdf>

**Integrated pipeline Project Q-48**

Integrated Pipeline Project. Monthly executive summary (2016, June) Dallas Water Utilities. Retrieved from: http://www.trwd.com/wp-content/uploads/March2016_FINAL_web.pdf

Webb D. Integrated Pipeline project to furnish water for 1.5 million new DFW residents. Retrieved from: <http://www.cedarcreeklake.com/lake-life--Integrated-Pipeline-project-to-furnish-water-for-15-million-new-DFW-residents/1050>

**Kansas Aqueduct**

Kansas Aqueduct Coalition. Official website: <http://www.kansasaqueductcoalition.com/>

Walton B (2013, October 24) [Kansas and Army Corps Revive Study to Ship Water from Missouri River to Ogallala Aquifer](http://www.circleofblue.org/2013/world/kansas-army-corps-study-aqueduct-missouri-river-ogallala-aquifer/). WaterNews. Retrieved from: <http://www.circleofblue.org/2013/world/kansas-army-corps-study-aqueduct-missouri-river-ogallala-aquifer/>

Helling D (2015, January 14) Kansas aqueduct cost is pegged at $18 billion. Retrieved from: <http://www.kansascity.com/news/politics-government/article6504177.html>

**Klymchuk project "The 1% solution”**

Klymchuk D (2008) Water exports. The 1% solution. Frontier Center for public policy. Backgrounde, N62. Retrieved from: https://fcpp.org/pdf/FB062_Water_JUNEF.pdf

**Lake Powell pipeline**

The Lake Powell pipeline:  A Key to Our Long-Term Water Future. Project website: http://lpputah.org/

Lake Power Water Database. Retrieved from: <http://lakepowell.water-data.com/>

Lake Powell Pipeline. Retrieved from: <http://www.wcwcd.org/wp-content/themes/wcwcd/pdf/LakePowellPipeline.pdf>

**Magnum Diversion Scheme**

de Silva A (1997)The Sale of Canadian Water to the United States: A Review of Proposals, Agreements and Policies. [Environment Probe](https://environment.probeinternational.org/author/elizabethbrubaker/). Retrieved from: <https://environment.probeinternational.org/1997/08/18/sale-canadian-water-united-states-review-proposals-agreements-and-policies/>

Forest B, Forest P (2012) Engineering the North American waterscape: the high modernist mapping of continental water transfer projects. Political Geography 31:167–183.

# McGregor River diversion

ICID (2005) Experiences in inter-basin water transfers for irrigation, drainage or flood management (3rd draft 15 August 2005). Unpublished report. International Commission on Irrigation and Drainage ICID-CIID, New Delhi. URL: <http://www.icid.org/ibwt_draft_aug05.pdf>

Seagel GC, Pugh MF (1981) A perspective on water transfer: McGregor diversion project, Canadian Water Resources Journal, 6, 76-88.

**Mid-Barataria Sediment Diversion**

Schleifstein M (2013, September 18) Louisiana could begin building Mid-Barataria sediment diversion by late 2015. Retrieved from: <http://www.nola.com/environment/index.ssf/2013/09/louisiana_could_begin_building.html>

Schleifstein M (2017, July 31) Historic vote moves 2 Mississippi River sediment diversions toward construction. Retrieved from: <http://www.nola.com/environment/index.ssf/2015/10/historic_vote_moves_two_missis.html>

Anchor S (2014) $1 billion cost estimate prompts Louisiana to rethink coastal project. FOX8 Local First. Retrieved from: <http://www.fox8live.com/story/26693147/1-billion-cost-estimate-prompts-louisiana-to-rethink-coastal-project>

**Missouri River Pipeline**

Wockner G (2015, February 17) Missouri River Pipeline Bill Highlights Fiscal Irresponsibility of Colorado Water Plan. Save the Colorado. Retrieved from: <http://www.savethecolorado.org/blog/press-release-missouri-river-pipeline-bill-highlights-fiscal-irresponsibility-of-colorado-water-plan/>

**Multinational Resources Proposal**

Little S.P. (1996) Canada's Capacity to Control the Flow: Water Export and the North American Free Trade Agreement, Pace International Law Review, volume 8, 127. Retrieved from: http://digitalcommons.pace.edu/pilr/vol8/iss1/3

**Navajo-Gallup Water Supply Project (NGWSP)**

Navajo-Gallup Water Supply Project (NGWSP), New Mexico, United States of America. Retrieved from: <http://www.water-technology.net/projects/navajo-gallup-water-supply-project-ngwsp-new-mexico-us/>

Navajo-Gallup Water Supply Project. Planning Report and Final Environmental Impact Statement. (2009) U.S. Department of the Interior, Bureau of Reclamation. Retrieved from: <https://www.usbr.gov/uc/envdocs/eis/navgallup/FEIS/vol1/Volume1.pdf>

**New York's City Tunnel No. 3**

New York City Tunnel No. 3, United States of America. Retrieved from: <http://www.water-technology.net/projects/new-york-tunnel-3/>

Rush J (2015, May 27) A Look at New York’s City Tunnel No. 3. Tunnel Business Magazine. Retrieved from: https://tunnelingonline.com/look-new-yorks-city-tunnel-3/

**North American Water And Power Alliance (NAWAPA) / NAWAPA XXI**

Nuclear NAWAPA XXI: Gateway to the Fusion Economy (2013) 21st century science and technology special report. Retrieved from: <http://21stcenturysciencetech.com/Nuclear_NAWAPA_XXI/Nuclear_NAWAPA_sm.pdf>

Nijhuis M (2015, September 18) The Forgotten Project That Could Have Saved America From Drought. BuzzFeed News. Retrieved from: <https://www.buzzfeed.com/nijhuis/pipe-dreams-the-forgotten-project-that-could-have-saved-amer?utm_term=.ayBGlaw33#.xd0rb2W00>)

NAWAPA XXI Animated Overview (2012, April 14) Retrieved from: <http://archive.larouchepac.com/nawapaxxi/overview>

**North American Waters (NAWAMP)**

Forest B, Forest P (2012) Engineering the North American waterscape: the high modernist mapping of continental water transfer projects. Political Geography 31:167–183.

**Plan Hidráulico del Noroeste (PLHINO)**

Small D (2007) U.S. and Mexico: Cooperate On Great Water Projects. Executive Intelligence Review, 34:64-73 Retrieved from: <http://www.larouchepub.com/eiw/public/2007/eirv34n47-48-20071207/eirv34n47-48-20071207.pdf>

**Seattle-California pipeline**

Lilley J (2015, May 9) William Shatner proposes $30 billion water pipeline from Seattle to drought-stricken California. Natural News. Retrieved from: https://www.naturalnews.com/049646_drought_pipeline_William_Shatner.html

**Smith Plan (The Western States Water Augmentation Concept (WSWAC))**

de Silva A (1997)The Sale of Canadian Water to the United States: A Review of Proposals, Agreements and Policies. [Environment Probe](https://environment.probeinternational.org/author/elizabethbrubaker/). Retrieved from: <https://environment.probeinternational.org/1997/08/18/sale-canadian-water-united-states-review-proposals-agreements-and-policies/>

**Snake-Colorado Project**

ICID (2005) Experiences in inter-basin water transfers for irrigation, drainage or flood management (3rd draft 15 August 2005). Unpublished report. International Commission on Irrigation and Drainage ICID-CIID, New Delhi. URL: <http://www.icid.org/ibwt_draft_aug05.pdf>

Ghassemi F., White, I. (2007). Inter-basin Water Transfer: Case Studies from Australia, United States, Canada, China, and India International hydrology series. Cambridge University Press.

**Southern Delivery System (SDS) project**

Southern Delivery System (SDS) Water Project, Colorado, United States of America. Retrieved from: <http://www.water-technology.net/projects/southern-delivery-system-water-project/>

SDS. Water for generations. Project’s website: http://www.sdswater.org

**Texas Water Plan**

ICID (2005) Experiences in inter-basin water transfers for irrigation, drainage or flood management (3rd draft 15 August 2005). Unpublished report. International Commission on Irrigation and Drainage ICID-CIID, New Delhi. URL: <http://www.icid.org/ibwt_draft_aug05.pdf>

**Yampa River Pumpback Project**

Friends of the Yampa. Retrieved from: <http://friendsoftheyampa.com/yampa-river-pumpback/>

Wockner G (2017, June 23) In Colorado Water Plan, Proposed Yampa River Pumpback Alive, Would Further Drain the Colorado River. Save the Colorado. Retrieved from: http://savethecolorado.org/colorado-water-plan-proposed-yampa-river-pumpback-would-further-drain-the-colorado-river/

**SOUTH AMERICA**

**ALTO MAIPO Hydroelectric Project" (PHAM)**

Harris M (2017, July 14) Chilean court sides with developer after builder stops work at 531-MW Alto Maipo hydroelectric project. Retrieved from: <http://www.hydroworld.com/articles/2017/07/chilean-court-sides-with-developer-after-builder-stops-work-at-531-mw-alto-maipo-hydroelectric-project.html>

Fact sheet: Chile’s Alto Maipo Hydroelectric Project (PHAM) Retrieved from: http://www.ciel.org/wp-content/uploads/2017/02/FactSheet_AltoMaipo_Chile.pdf

AES Gener sees costs rising further at Chilean hydropower project (2017, August 1) Reuters. Retrieved from: <https://www.reuters.com/article/us-aes-gener-hydro/aes-gener-sees-costs-rising-further-at-chilean-hydropower-project-idUSKBN1AG2MX>

Alto Maipo Hydroelectric Porject, Chile. Geodata Underground solutions. Retrieved from: <http://www.geodata.it/it/hydro/73-hydro/cile/252-alto-maipo-hydroelectric-project-chile>

**Aquatacama**

Dourojeanni A, Jadue N, León G, Osborne K, Serra D (2013) Aquatacama Project: preliminary socio-economic analysis. Fundacion Chile. Retrieved from: http://www.acquatacama.cl/sites/default/files/AQUATACAMA%20REPORT%20FINAL%20-%20F.%20Chile.pdf

Dossier de Prensa Presentación Final: Estudio preliminar Proyecto Aquatacama. Retrieved from: <http://www.acquatacama.cl/sites/default/files/ResumenProyecto.pdf>

Sena B (2016, June 28) Chile's Aquatacama water pipeline project still in the works. BN Americas. Retrieved from: <http://www.bnamericas.com/en/news/waterandwaste/chiles-aquatacama-water-pipeline-project-still-in-the-works1>

**Hidrovia Amazonica**

El ambicioso proyecto de la Hidrovía Amazónica que busca impulsar el transporte entre las comunidades de la selva de Perú y Brasil (2017, Julio 7) Retrieved from: <http://www.bbc.com/mundo/noticias-america-latina-40531430>

Hidrovía Amazónica - Segunda Convocatoria. Retrieved from: <http://www.proyectosapp.pe/modulos/JER/PlantillaProyecto.aspx?ARE=0&PFL=2&JER=8332>

Arrendondo IA (2017, July 6) Primera etapa de las hidrovías en la selva peruana estará operativa en el 2020. Retrieved from: <http://elcomercio.pe/economia/primera-etapa-hidrovias-selva-peruana-estara-operativa-2020-440284>

**Hidrovia Project**

Silveira M. International environmental law: The South American Hidrovia Parana – Paraguay. Retrieved from: <http://www.chasque.net/rmartine/hidrovia/Envxtrad.html>

Hughes J, Husza PC (1997) The South American Hidrovia Debate. Choices. Retrieved from: <http://ageconsearch.umn.edu/record/131380/files/SAHidroviaDebate.pdf>

Paraguay-Paraná Hidrovia. International Rivers. Retrieved from: http//www.internationalrivers.org/campaigns/paraguay-paraná-hidrovia

Huszar PC (1998) Overestimated benefits and underestimated costs: the case of the Paraguay—Paraná navigation study, Impact Assessment and Project Appraisal, 16:295-304.

**Sao Francisco Irrigation Project**

Stolf R, Piedade SMD, Da Silva JR, Da Silva LCF, Maniero MA (2012) Water transfer from Sao Francisco River to semiarid northeast of Brazil: technical data, environmental impacts, survey of option about the amount to be transferred. Engenharia Agricola 32:998-1010

Mance H (2012, April 12) Brazil's huge river diversion project divides opinion. BBC News. Retrieved from: <http://news.bbc.co.uk/2/hi/8575010.stm>

Osava M (2011, October 11) BRAZIL: Costly Water for the Poor Northeast. Inter Press Service. Retrieved from: <http://www.ipsnews.net/2011/10/brazil-costly-water-for-the-poor-northeast/>

**Via Hidrica del Norte**

Las aguas del sur de Chile calman la "sed minera" del norte. Instituto de Ingenieros de minas de Chili. Retrieved from: http://www.iimch.cl/index.php/noticias/14-actualidad2015/773-las-aguas-del-sur-de-chile-calman-la-sed-minera-del-norte

Abarca JA (2013, April 12) Vía Hídrica del Norte de Chile: Nueva alternativa para proveer de agua al árido norte de Chile. BN Americas. Retrived from: https://www.bnamericas.com/es/entrevistas/aguasyresiduos/santiago-manzano-antonio-dominguez-y-juan-pablo-gutierrez-euro-engineering-group

Situación Hídrica Nacional (2015) Retrived from: <http://www.infraestructurapublica.cl/wp-content/uploads/2016/11/F.Prieto_Presentacion-Via-Hidrica-del-Norte.pdf>

El otro proyecto de carretera hídrica que está sobre la mesa (2013, April 29) Futuro Renovable. Retrieved from: http://www.futurorenovable.cl/el-otro-proyecto-de-carretera-hidrica-que-esta-sobre-la-mesa/
